# Supplementary material
Source: publisher figshare collection journal article supplement (https://acs.figshare.com/ndownloader/files/4553686)
Supplement: Supplementary file 1 [file 4553686]

 
data_d09014 
  
_audit_creation_method            SHELXL-97 
_chemical_name_systematic 
; 
 ? 
; 
_chemical_name_common             ? 
_chemical_melting_point           ? 
_chemical_formula_moiety          ? 
_chemical_formula_sum 
 'C12 H20 O4' 
_chemical_formula_weight          228.28 
_chemical_absolute_configuration  ad
  
loop_ 
 _atom_type_symbol 
 _atom_type_description 
 _atom_type_scat_dispersion_real 
 _atom_type_scat_dispersion_imag 
 _atom_type_scat_source 
 'C'  'C'   0.0181   0.0091 
 'International Tables Vol C Tables 4.2.6.8 and 6.1.1.4' 
 'H'  'H'   0.0000   0.0000 
 'International Tables Vol C Tables 4.2.6.8 and 6.1.1.4' 
 'O'  'O'   0.0492   0.0322 
 'International Tables Vol C Tables 4.2.6.8 and 6.1.1.4' 
  
_symmetry_cell_setting            Monoclinic 
_symmetry_space_group_name_H-M    P2(1) 
  
loop_ 
 _symmetry_equiv_pos_as_xyz 
 'x, y, z' 
 '-x, y+1/2, -z' 
  
_cell_length_a                    10.4928(3) 
_cell_length_b                    5.17550(10) 
_cell_length_c                    11.2885(3) 
_cell_angle_alpha                 90.00 
_cell_angle_beta                  112.4120(10) 
_cell_angle_gamma                 90.00 
_cell_volume                      566.72(2) 
_cell_formula_units_Z             2 
_cell_measurement_temperature     100(2) 
_cell_measurement_reflns_used     9709 
_cell_measurement_theta_min       4.24 
_cell_measurement_theta_max       68.44 
  
_exptl_crystal_description        needle 
_exptl_crystal_colour             colourless 
_exptl_crystal_size_max           0.48 
_exptl_crystal_size_mid           0.12 
_exptl_crystal_size_min           0.10 
_exptl_crystal_density_meas       ? 
_exptl_crystal_density_diffrn     1.338 
_exptl_crystal_density_method     'not measured' 
_exptl_crystal_F_000              248 
_exptl_absorpt_coefficient_mu     0.814 
_exptl_absorpt_correction_type    multi-scan 
_exptl_absorpt_correction_T_min   0.6959 
_exptl_absorpt_correction_T_max   0.9230 
_exptl_absorpt_process_details    'SADABS (Sheldrick, 2008)' 
  
_exptl_special_details 
; 
 'Bruker three-circle diffractometer, Bruker APEX CCD' 
; 
  
_diffrn_ambient_temperature       100(2) 
_diffrn_radiation_wavelength      1.54178 
_diffrn_radiation_type            CuK\a 
_diffrn_radiation_source          'fine-focus sealed tube' 
_diffrn_radiation_monochromator   graphite 
_diffrn_measurement_device_type   'Bruker Smart APEX CCD' 
_diffrn_measurement_method        'omega and phi scans' 
_diffrn_detector_area_resol_mean  8.3 
_diffrn_reflns_number             10799 
_diffrn_reflns_av_R_equivalents   0.0185 
_diffrn_reflns_av_sigmaI/netI     0.0118 
_diffrn_reflns_limit_h_min        -12 
_diffrn_reflns_limit_h_max        12 
_diffrn_reflns_limit_k_min        -6 
_diffrn_reflns_limit_k_max        6 
_diffrn_reflns_limit_l_min        -13 
_diffrn_reflns_limit_l_max        13 
_diffrn_reflns_theta_min          4.24 
_diffrn_reflns_theta_max          67.66 
_reflns_number_total              2028 
_reflns_number_gt                 2005 
_reflns_threshold_expression      >2sigma(I) 
  
_computing_data_collection        'APEX2 3.0 (Bruker-AXS, 2008)' 
_computing_cell_refinement        'SAINT 7.46A (Bruker-AXS, 2008)' 
_computing_data_reduction         'SAINT 7.46A (Bruker-AXS, 2008)' 
_computing_structure_solution     'SHELXS-97 (Sheldrick, 2008)' 
_computing_structure_refinement   'SHELXL-97 (Sheldrick, 2008)' 
_computing_molecular_graphics     'Bruker SHELXTL' 
_computing_publication_material   'Bruker SHELXTL' 
  
_refine_special_details 
; 
 Refinement of F^2^ against ALL reflections.  The weighted R-factor wR and 
 goodness of fit S are based on F^2^, conventional R-factors R are based 
 on F, with F set to zero for negative F^2^. The threshold expression of 
 F^2^ > 2sigma(F^2^) is used only for calculating R-factors(gt) etc. and is 
 not relevant to the choice of reflections for refinement.  R-factors based 
 on F^2^ are statistically about twice as large as those based on F, and R- 
 factors based on ALL data will be even larger. 
; 
  
_refine_ls_structure_factor_coef  Fsqd 
_refine_ls_matrix_type            full 
_refine_ls_weighting_scheme       calc 
_refine_ls_weighting_details 
 'calc w=1/[\s^2^(Fo^2^)+(0.0503P)^2^+0.0865P] where P=(Fo^2^+2Fc^2^)/3' 
_atom_sites_solution_primary      direct 
_atom_sites_solution_secondary    difmap 
_atom_sites_solution_hydrogens    geom 
_refine_ls_hydrogen_treatment     mixed 
_refine_ls_extinction_method      SHELXL 
_refine_ls_extinction_coef        0.0103(11) 
_refine_ls_extinction_expression 
 'Fc^*^=kFc[1+0.001xFc^2^\l^3^/sin(2\q)]^-1/4^' 
_refine_ls_abs_structure_details 
 'Flack H D (1983), Acta Cryst. A39, 876-881' 
_refine_ls_abs_structure_Flack    0.07(13) 
_refine_ls_number_reflns          2028 
_refine_ls_number_parameters      150 
_refine_ls_number_restraints      2 
_refine_ls_R_factor_all           0.0283 
_refine_ls_R_factor_gt            0.0281 
_refine_ls_wR_factor_ref          0.0842 
_refine_ls_wR_factor_gt           0.0839 
_refine_ls_goodness_of_fit_ref    1.102 
_refine_ls_restrained_S_all       1.101 
_refine_ls_shift/su_max           0.000 
_refine_ls_shift/su_mean          0.000 
  
loop_ 
 _atom_site_label 
 _atom_site_type_symbol 
 _atom_site_fract_x 
 _atom_site_fract_y 
 _atom_site_fract_z 
 _atom_site_U_iso_or_equiv 
 _atom_site_adp_type 
 _atom_site_occupancy 
 _atom_site_symmetry_multiplicity 
 _atom_site_calc_flag 
 _atom_site_refinement_flags 
 _atom_site_disorder_assembly 
 _atom_site_disorder_group 
O1 O 0.36236(7) 0.46642(18) 0.76029(7) 0.0170(2) Uani 1 1 d . . . 
O2 O 0.33137(7) 0.80928(15) 0.46470(7) 0.0151(2) Uani 1 1 d . . . 
O3 O -0.00301(7) 0.47310(16) 0.34327(7) 0.0144(2) Uani 1 1 d . . . 
O4 O -0.02720(8) 0.76477(19) 0.04092(7) 0.0179(2) Uani 1 1 d D . . 
H4 H -0.0149(15) 0.911(3) 0.0209(14) 0.022 Uiso 1 1 d D . . 
C1 C 0.50693(11) 0.5023(3) 0.83296(11) 0.0188(3) Uani 1 1 d . . . 
H1A H 0.5596 0.3702 0.8071 0.023 Uiso 1 1 calc R . . 
H1B H 0.5259 0.4773 0.9251 0.023 Uiso 1 1 calc R . . 
C2 C 0.55583(11) 0.7711(3) 0.81308(11) 0.0194(3) Uani 1 1 d . . . 
H2A H 0.6568 0.7844 0.8600 0.023 Uiso 1 1 calc R . . 
H2B H 0.5113 0.9034 0.8477 0.023 Uiso 1 1 calc R . . 
C3 C 0.51972(11) 0.8208(2) 0.67013(11) 0.0171(3) Uani 1 1 d . . . 
H3A H 0.5433 1.0008 0.6568 0.021 Uiso 1 1 calc R . . 
H3B H 0.5729 0.7026 0.6373 0.021 Uiso 1 1 calc R . . 
C4 C 0.36640(11) 0.7752(2) 0.59939(11) 0.0151(3) Uani 1 1 d . . . 
H4A H 0.3140 0.9033 0.6295 0.018 Uiso 1 1 calc R . . 
C5 C 0.32843(11) 0.5011(2) 0.62626(10) 0.0143(3) Uani 1 1 d . . . 
H5 H 0.3810 0.3730 0.5964 0.017 Uiso 1 1 calc R . . 
C6 C 0.17449(11) 0.4540(3) 0.55541(10) 0.0149(3) Uani 1 1 d . . . 
H6A H 0.1509 0.2742 0.5690 0.018 Uiso 1 1 calc R . . 
H6B H 0.1207 0.5731 0.5871 0.018 Uiso 1 1 calc R . . 
C7 C 0.14201(11) 0.5017(2) 0.41443(10) 0.0132(3) Uani 1 1 d . . . 
H7 H 0.1926 0.3722 0.3830 0.016 Uiso 1 1 calc R . . 
C8 C 0.18702(10) 0.7744(2) 0.39372(11) 0.0143(3) Uani 1 1 d . . . 
H8 H 0.1346 0.9042 0.4229 0.017 Uiso 1 1 calc R . . 
C9 C 0.15609(12) 0.8150(2) 0.25273(11) 0.0153(3) Uani 1 1 d . . . 
H9A H 0.2131 0.6966 0.2245 0.018 Uiso 1 1 calc R . . 
H9B H 0.1788 0.9947 0.2380 0.018 Uiso 1 1 calc R . . 
C10 C 0.00319(11) 0.7624(2) 0.17572(10) 0.0149(3) Uani 1 1 d . . . 
H10 H -0.0534 0.8974 0.1964 0.018 Uiso 1 1 calc R . . 
C11 C -0.03810(11) 0.4944(2) 0.20777(10) 0.0142(3) Uani 1 1 d . . . 
H11 H 0.0135 0.3596 0.1807 0.017 Uiso 1 1 calc R . . 
C12 C -0.19136(11) 0.4438(3) 0.14120(10) 0.0188(3) Uani 1 1 d . . . 
H12A H -0.2138 0.2764 0.1689 0.028 Uiso 1 1 calc R . . 
H12B H -0.2164 0.4418 0.0482 0.028 Uiso 1 1 calc R . . 
H12C H -0.2429 0.5806 0.1634 0.028 Uiso 1 1 calc R . . 
  
loop_ 
 _atom_site_aniso_label 
 _atom_site_aniso_U_11 
 _atom_site_aniso_U_22 
 _atom_site_aniso_U_33 
 _atom_site_aniso_U_23 
 _atom_site_aniso_U_13 
 _atom_site_aniso_U_12 
O1 0.0158(4) 0.0205(5) 0.0128(4) 0.0026(4) 0.0033(3) -0.0007(4) 
O2 0.0146(4) 0.0180(5) 0.0125(4) 0.0007(3) 0.0047(3) -0.0022(3) 
O3 0.0128(4) 0.0176(5) 0.0122(4) 0.0012(3) 0.0043(3) -0.0013(4) 
O4 0.0249(4) 0.0161(4) 0.0126(4) 0.0016(4) 0.0068(3) -0.0017(4) 
C1 0.0168(5) 0.0194(6) 0.0163(5) 0.0014(5) 0.0020(4) -0.0003(5) 
C2 0.0159(5) 0.0201(7) 0.0189(6) 0.0000(5) 0.0031(4) -0.0020(5) 
C3 0.0164(5) 0.0160(6) 0.0185(6) -0.0003(5) 0.0062(4) -0.0010(5) 
C4 0.0157(5) 0.0148(7) 0.0144(6) 0.0011(5) 0.0055(4) 0.0008(5) 
C5 0.0174(5) 0.0128(6) 0.0132(5) -0.0004(5) 0.0063(4) 0.0008(5) 
C6 0.0148(5) 0.0152(7) 0.0150(5) 0.0009(5) 0.0061(4) -0.0004(5) 
C7 0.0130(5) 0.0116(6) 0.0149(5) -0.0010(5) 0.0052(4) 0.0005(5) 
C8 0.0127(5) 0.0140(7) 0.0164(6) 0.0005(5) 0.0056(4) 0.0002(5) 
C9 0.0178(5) 0.0134(6) 0.0161(6) 0.0010(5) 0.0079(4) -0.0006(4) 
C10 0.0174(5) 0.0148(6) 0.0131(5) 0.0009(5) 0.0066(4) 0.0016(5) 
C11 0.0174(5) 0.0138(6) 0.0118(5) -0.0010(5) 0.0059(4) 0.0010(5) 
C12 0.0172(5) 0.0222(7) 0.0164(5) 0.0016(5) 0.0056(4) -0.0016(5) 
  
_geom_special_details 
; 
 All esds (except the esd in the dihedral angle between two l.s. planes) 
 are estimated using the full covariance matrix.  The cell esds are taken 
 into account individually in the estimation of esds in distances, angles 
 and torsion angles; correlations between esds in cell parameters are only 
 used when they are defined by crystal symmetry.  An approximate (isotropic) 
 treatment of cell esds is used for estimating esds involving l.s. planes. 
; 
  
loop_ 
 _geom_bond_atom_site_label_1 
 _geom_bond_atom_site_label_2 
 _geom_bond_distance 
 _geom_bond_site_symmetry_2 
 _geom_bond_publ_flag 
O1 C5 1.4274(12) . ? 
O1 C1 1.4351(13) . ? 
O2 C8 1.4295(12) . ? 
O2 C4 1.4325(13) . ? 
O3 C7 1.4320(12) . ? 
O3 C11 1.4345(12) . ? 
O4 C10 1.4308(13) . ? 
O4 H4 0.814(13) . ? 
C1 C2 1.5284(17) . ? 
C1 H1A 0.9900 . ? 
C1 H1B 0.9900 . ? 
C2 C3 1.5322(16) . ? 
C2 H2A 0.9900 . ? 
C2 H2B 0.9900 . ? 
C3 C4 1.5172(14) . ? 
C3 H3A 0.9900 . ? 
C3 H3B 0.9900 . ? 
C4 C5 1.5346(16) . ? 
C4 H4A 1.0000 . ? 
C5 C6 1.5241(14) . ? 
C5 H5 1.0000 . ? 
C6 C7 1.5154(14) . ? 
C6 H6A 0.9900 . ? 
C6 H6B 0.9900 . ? 
C7 C8 1.5342(15) . ? 
C7 H7 1.0000 . ? 
C8 C9 1.5128(15) . ? 
C8 H8 1.0000 . ? 
C9 C10 1.5298(14) . ? 
C9 H9A 0.9900 . ? 
C9 H9B 0.9900 . ? 
C10 C11 1.5367(16) . ? 
C10 H10 1.0000 . ? 
C11 C12 1.5159(15) . ? 
C11 H11 1.0000 . ? 
C12 H12A 0.9800 . ? 
C12 H12B 0.9800 . ? 
C12 H12C 0.9800 . ? 
  
loop_ 
 _geom_angle_atom_site_label_1 
 _geom_angle_atom_site_label_2 
 _geom_angle_atom_site_label_3 
 _geom_angle 
 _geom_angle_site_symmetry_1 
 _geom_angle_site_symmetry_3 
 _geom_angle_publ_flag 
C5 O1 C1 111.82(8) . . ? 
C8 O2 C4 111.57(8) . . ? 
C7 O3 C11 112.09(8) . . ? 
C10 O4 H4 107.9(10) . . ? 
O1 C1 C2 112.01(9) . . ? 
O1 C1 H1A 109.2 . . ? 
C2 C1 H1A 109.2 . . ? 
O1 C1 H1B 109.2 . . ? 
C2 C1 H1B 109.2 . . ? 
H1A C1 H1B 107.9 . . ? 
C1 C2 C3 110.20(10) . . ? 
C1 C2 H2A 109.6 . . ? 
C3 C2 H2A 109.6 . . ? 
C1 C2 H2B 109.6 . . ? 
C3 C2 H2B 109.6 . . ? 
H2A C2 H2B 108.1 . . ? 
C4 C3 C2 108.36(9) . . ? 
C4 C3 H3A 110.0 . . ? 
C2 C3 H3A 110.0 . . ? 
C4 C3 H3B 110.0 . . ? 
C2 C3 H3B 110.0 . . ? 
H3A C3 H3B 108.4 . . ? 
O2 C4 C3 109.33(9) . . ? 
O2 C4 C5 110.05(9) . . ? 
C3 C4 C5 110.05(10) . . ? 
O2 C4 H4A 109.1 . . ? 
C3 C4 H4A 109.1 . . ? 
C5 C4 H4A 109.1 . . ? 
O1 C5 C6 108.80(8) . . ? 
O1 C5 C4 110.31(9) . . ? 
C6 C5 C4 110.31(9) . . ? 
O1 C5 H5 109.1 . . ? 
C6 C5 H5 109.1 . . ? 
C4 C5 H5 109.1 . . ? 
C7 C6 C5 107.10(9) . . ? 
C7 C6 H6A 110.3 . . ? 
C5 C6 H6A 110.3 . . ? 
C7 C6 H6B 110.3 . . ? 
C5 C6 H6B 110.3 . . ? 
H6A C6 H6B 108.5 . . ? 
O3 C7 C6 109.74(8) . . ? 
O3 C7 C8 109.42(9) . . ? 
C6 C7 C8 110.53(9) . . ? 
O3 C7 H7 109.0 . . ? 
C6 C7 H7 109.0 . . ? 
C8 C7 H7 109.0 . . ? 
O2 C8 C9 109.18(8) . . ? 
O2 C8 C7 110.66(9) . . ? 
C9 C8 C7 109.46(9) . . ? 
O2 C8 H8 109.2 . . ? 
C9 C8 H8 109.2 . . ? 
C7 C8 H8 109.2 . . ? 
C8 C9 C10 109.33(9) . . ? 
C8 C9 H9A 109.8 . . ? 
C10 C9 H9A 109.8 . . ? 
C8 C9 H9B 109.8 . . ? 
C10 C9 H9B 109.8 . . ? 
H9A C9 H9B 108.3 . . ? 
O4 C10 C9 111.29(9) . . ? 
O4 C10 C11 106.83(9) . . ? 
C9 C10 C11 110.82(9) . . ? 
O4 C10 H10 109.3 . . ? 
C9 C10 H10 109.3 . . ? 
C11 C10 H10 109.3 . . ? 
O3 C11 C12 107.92(8) . . ? 
O3 C11 C10 109.85(9) . . ? 
C12 C11 C10 112.35(9) . . ? 
O3 C11 H11 108.9 . . ? 
C12 C11 H11 108.9 . . ? 
C10 C11 H11 108.9 . . ? 
C11 C12 H12A 109.5 . . ? 
C11 C12 H12B 109.5 . . ? 
H12A C12 H12B 109.5 . . ? 
C11 C12 H12C 109.5 . . ? 
H12A C12 H12C 109.5 . . ? 
H12B C12 H12C 109.5 . . ? 
  
loop_ 
 _geom_hbond_atom_site_label_D 
 _geom_hbond_atom_site_label_H 
 _geom_hbond_atom_site_label_A 
 _geom_hbond_distance_DH 
 _geom_hbond_distance_HA 
 _geom_hbond_distance_DA 
 _geom_hbond_angle_DHA 
 _geom_hbond_site_symmetry_A 
O4 H4 O4  0.814(13) 2.066(13) 2.8772(7) 174.0(14) 2 
  
_diffrn_measured_fraction_theta_max    0.997 
_diffrn_reflns_theta_full              67.66 
_diffrn_measured_fraction_theta_full   0.997 
_refine_diff_density_max    0.251 
_refine_diff_density_min   -0.176 
_refine_diff_density_rms    0.037 
